# Supplementary material
Source: HighWire-hosted journal article supplement (https://erj.ersjournals.com/content/57/1/2003921)
Supplement: inline-supplementary-material-1 [file inline-supplementary-material-1.pdf]

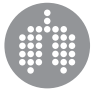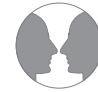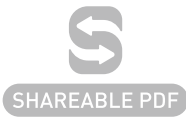

# User-life of ICS/LABA inhaler devices should be considered when prescribed as relievers

Roy A. Pleasants<sup>1</sup>, Stephen L. Tilley<sup>1</sup>, Anthony J. Hickey<sup>2,3</sup> and Omar S. Usmani<sup>4</sup>

**Affiliations:** <sup>1</sup>University of North Carolina at Chapel Hill, Division of Pulmonary Diseases and Critical Care Medicine, Chapel Hill, NC, USA. <sup>2</sup>RTI International, Engineered Systems, Research Triangle Park, NC, USA. <sup>3</sup>University of North Carolina at Chapel Hill, Eshelman School of Pharmacy, Chapel Hill, NC, USA. <sup>4</sup>Imperial College London and Royal Brompton Hospital, National Heart and Lung Institute, London, UK.

**Correspondence:** Roy A. Pleasants, University of North Carolina at Chapel Hill, Division of Pulmonary Diseases and Critical Care Medicine, 7202 Marsico Hall, 125 Mason Farm Road, Chapel Hill, NC 27599 USA. E-mail: roy.pleasants@unchealth.unc.edu

 @ERSpublications

**Prescribers and asthma patients should know that ICS/LABA combination inhalers used as reliever therapy may expire under patient use sooner than the expiration shown on the inhaler, compromising effectiveness if not considered by the prescriber and patient** <https://bit.ly/3fhHMX2>

**Cite this article as:** Pleasants RA, Tilley SL, Hickey AJ, *et al.* User-life of ICS/LABA inhaler devices should be considered when prescribed as relievers. *Eur Respir J* 2021; 57: 2003921 [<https://doi.org/10.1183/13993003.03921-2020>].

This single-page version can be shared freely online.

*To the Editor:*

Inhaled corticosteroid/formoterol (ICS/FOR) combination medications were initially developed as maintenance therapy; more recently they are also used as relievers in Europe and this use is proposed in the USA. ICS coupled with FOR (a long-acting  $\beta_2$ -agonist) is recommended by the 2020 Global Initiative for Asthma (GINA) guidelines [1] for steps 2–5 as maintenance and reliever (SMART) and is recommended for steps 3 and 4 in the 2020 USA National Asthma Education and Prevention Program (NAEPP) [2]. While SMART has regulatory approval in Europe, it does not in the USA.
